# Supplementary material for: Epidemiological and Clinical Observations of Gonococcal Infections in Women and Prevention Strategies
Source: MDPI journal article supplement (doi:10.3390/vaccines9040327), 2021-04-01
Supplement: s1 [file s1]

**Table S1: Clinical exam evaluated for exposed woman during her visit to the clinic**

| Clinical exam                     | Number of subjects and result                    |
|-----------------------------------|--------------------------------------------------|
| Pain on lateral motion of cervix: | 44 absent; 1 not examined                        |
| Uterine tenderness                | 44 absent; 1 minimal                             |
| Adnexal tenderness <sup>a</sup>   | 45 absent                                        |
| Adnexal mass <sup>a</sup>         | 44 absent; 1 not examined                        |
| Abdominal tenderness <sup>b</sup> | 43 absent; 1 minimal; 1 moderate                 |
| Hepatic tenderness <sup>c</sup>   | 43 absent; 2 not examined                        |
| Inguinal Nodes <sup>d</sup>       | 45 absent                                        |
| Genital lesions <sup>e</sup>      | 45 absent                                        |
| Vaginal Discharge <sup>f</sup>    | 39 present; 6 absent;                            |
| Purulent                          | 11 scant; 9 moderate                             |
| Clear or mucoid                   | 6 scant; 4 moderate                              |
| Grey-white                        | 8 scant                                          |
| Curdy                             | 1 scant                                          |
| Cervical discharge                | 36 present; 9 absent;                            |
| Purulent                          | 10 scant; 16 moderate                            |
| Clear or mucoid                   | 10 scant; 16 moderate                            |
| Bloody                            | 3 scant; 1 moderate                              |
| White                             | 1 scant; 2 moderate                              |
| Menstrual                         | 2 scant                                          |
| Inflammation of cervix            | 31 present; 14 absent                            |
| Rectal tenderness                 | 41 absent; 1 minimal; 1 moderate; 2 not examined |
| GNID                              | 36 present; 9 absent                             |
| PMN <sup>g</sup>                  | 1 absent; 4 low; 13 moderate; 27 high            |
| Vaginal, Wet prep:                | 23 normal; 22 abnormal                           |
| <i>Trichomonas vaginalis</i>      | 4 present 41 absent                              |
| <i>Candida albicans</i>           | 2 present; 43 absent                             |
| Clue cells (indicative for BV)    | 19 present; 26 absent                            |

|                               |                            |
|-------------------------------|----------------------------|
| Syphilis – dark field         | 9 absent; 36 not examined  |
| Syphilis – serology           | 2 present; 23 not examined |
| HSV-1 IgG                     | 10 absent; 35 not examined |
| HSV-1 IgM                     | 10 absent; 35 not examined |
| HSV-2 IgG                     | 10 absent; 35 not examined |
| HSV-2 IgM                     | 10 absent; 35 not examined |
| HPV                           | 10 absent; 35 not examined |
| <i>Chlamydia trachomatis</i>  | 16 present; 29 absent      |
| <i>Ureaplasma urealyticum</i> | 28 present; 17 absent      |
| <i>Mycoplasma genitalium</i>  | 7 present; 38 absent       |
| <i>Mycoplasma homini</i>      | 9 present; 36 absent       |

---

PMN: Cervical Gram's Stain for polymorphonuclear neutrophils; GNID: Cervical Gram's Stain for Gram negative intracellular diplococci; BV: bacterial vaginosis

<sup>a</sup> Right / Left

<sup>b</sup> Right / Left / Middle Upper Quadrant or Lower Quadrant

<sup>c</sup> Palpation / Percussion

<sup>d</sup> Right / Left / Skene's Gland abscess / Bartholin's cyst or abscess

<sup>e</sup> Chancres (syphilis) / Condyloma lata (syphilis) / Condyloma acuminata (HPV warts) / Vesicles (Herpes) / Ulcers (etiology unclear)

<sup>f</sup> Bloody, Foamy and Menstrual absent in all subjects

<sup>g</sup> Low: presence of 1-4 PMN; Moderate: presence of 5-9 PMN; High: presence of ≥10 PMN
